# Supplementary material
Source: Springer Nature journal article supplement (https://www.springermedizin.de/resource/supplementary/12913_2011_2041_MOESM2_ESM.pdf/9529670)

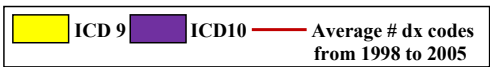

**a) All diagnoses**

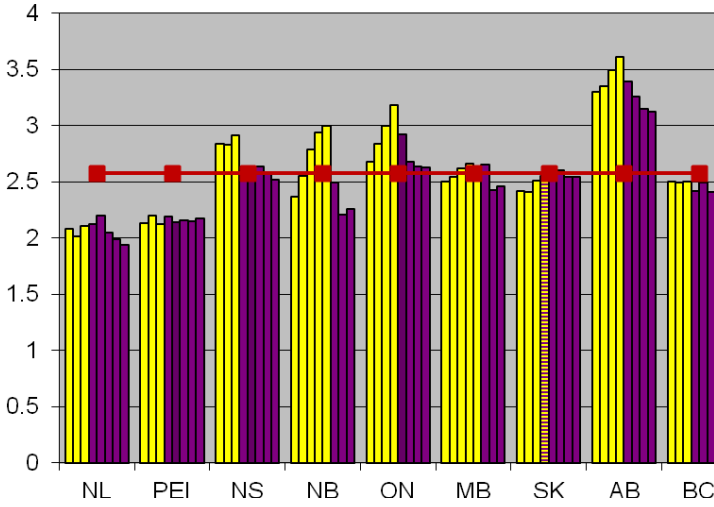

**b) Type 2 diagnosis (diagnosis arising sometime after hospital admission)**

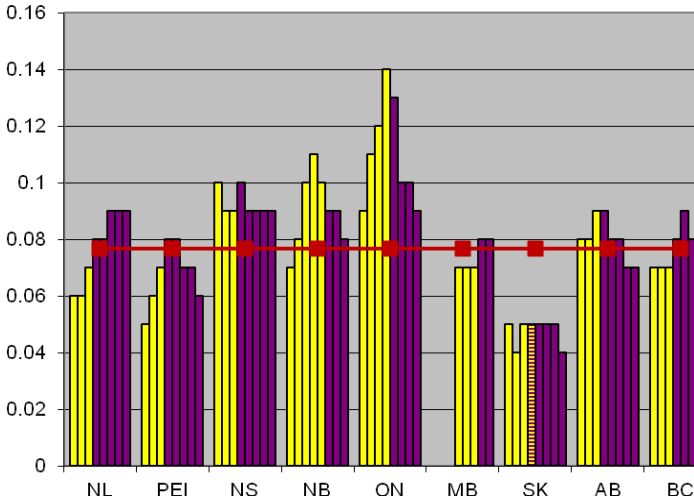

**c) Type 3 diagnosis (secondary diagnosis, present at hospital admission)**

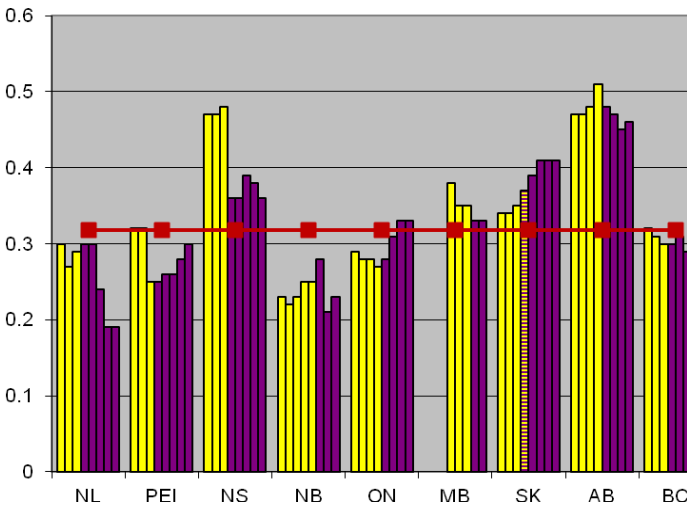

Supplement: MOESM2 [file 9529670]
